# Supplementary material for: The Anti-Müllerian Hormone as Endocrine and Molecular Marker Associated with Reproductive Performance in Holstein Dairy Cows Exposed to Heat Stress
Source: MDPI journal article supplement (doi:10.3390/ani14020213), 2024-01-09
Supplement: s1 [file s1]

**Supplementary Table S1.** Summary of previous results about GWAS for serum and plasma AMH concentration including references, number of SNPs, chromosomal position, candidate genes and heritability.

| Reference                  | No. SNPs | Chromosome (Position Mb) | Candidate Genes                      | Heritability ( $h^2 \pm SE$ ) |
|----------------------------|----------|--------------------------|--------------------------------------|-------------------------------|
| Nawaz et al., 2018         | 11       | BTA11 (92.059-99.413)    | DENND1A, NR5A1, NR6A1, PTGS1, NDUFA8 | 0.36 $\pm$ 0.03               |
|                            | 1        | BTA20 (25.689)           | FST                                  |                               |
| Gobikrushanth et al., 2018 | 44       | BTA7 (22.498-23.120)     | AMH                                  | 0.46 $\pm$ 0.31               |
|                            | 513      | BTA11 (88.859-102.944)   | FREM2                                |                               |
|                            | 86       | BTA20 (61.871-67.891)    | FGF18, MTRR                          |                               |
|                            | 1        | BTA25 (97.149-97.360)    | EEF2K                                |                               |
| Gobikrushanth et al., 2019 | 16       | BTA7 (21-359-21.886)     | AMH                                  | 0.45 $\pm$ 0.05               |
|                            | 52       | BTA11 (92.051-101.918)   | WDR38                                |                               |
| Grigoletto et al., 2020    |          | BTA5 (97.149-97.360)     | GPR19, CREBL2, DUSP16, BORCS5        | 0.28 $\pm$ 0.07               |
